# Supplementary material for: Catalytic Core-Shell Nanoparticles With Self-Supplied Calcium And H2O2 To Enable Combinational Tumor Inhibition
Source: Research Square preprint supplement (doi:10.21203/rs.3.rs-685150/v1), 2021-07-15
Supplement: Supplementary file 1 [file da6f41c692672f8f89250192.docx]

**Supporting Information**

**Catalytic Core-shell Nanoparticles with Self-supplied Calcium and H2O2 to enable Combinational Tumor Inhibition**

*Chao Fang,*1, # *Hanjing Kong,*1, # *Qiang Chu,*1, 2 *Zefeng Hu,*1 *Yi Zhou, 3 Gaorong Han*1 *and* *Xiang Li*1, 2 *

1 State Key Laboratory of Silicon Materials, School of Materials Science and Engineering, Zhejiang University, Hangzhou 310027, P.R. China

2 ZJU-Hangzhou Global Scientific and Technological Innovation Center, Zhejiang University, Hangzhou, 311200, P.R. China.

3 Stomatology Hospital, School of Medicine, Zhejiang University, 310006, P.R. China

**#** Authors with equal contribution

* Corresponding author: [xiang.li@zju.edu.cn](mailto:xiang.li@zju.edu.cn) (XL)


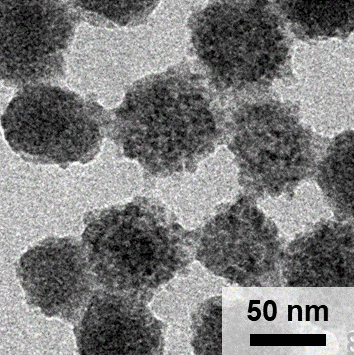


**Figure S1** TEM image of CaO2.


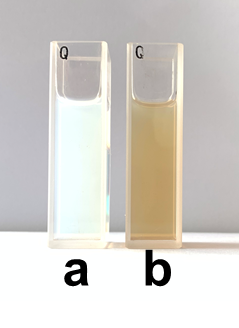


**Figure S2** Optical images of solutions containing (a) CaO2 and (b) CaO2@Co-Fc.


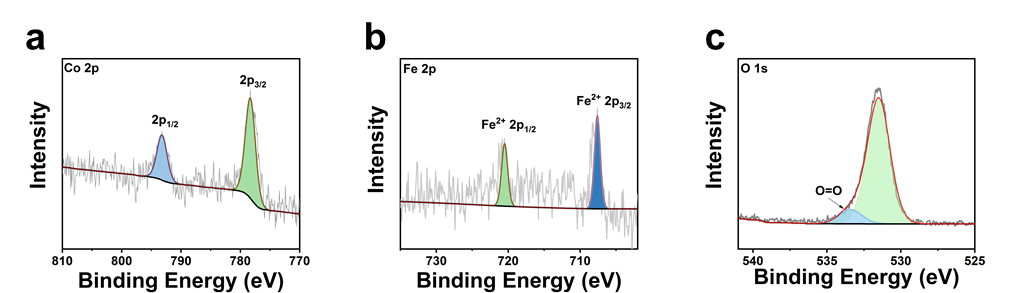


**Figure S3** High-resolution XPS spectra of (a) Co 2p, (b) Fe 2p and (c) O 1s.


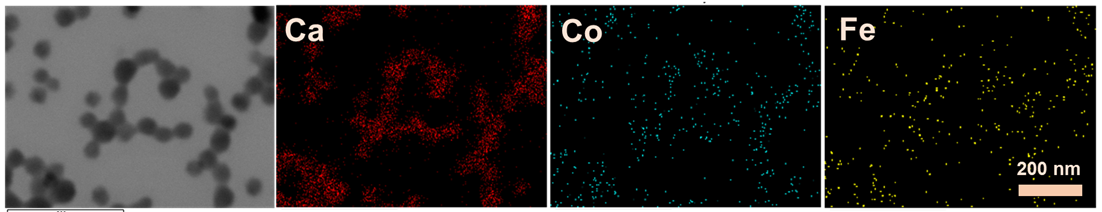


**Figure S4** Elemental mapping of CaO2@Co-Fc.


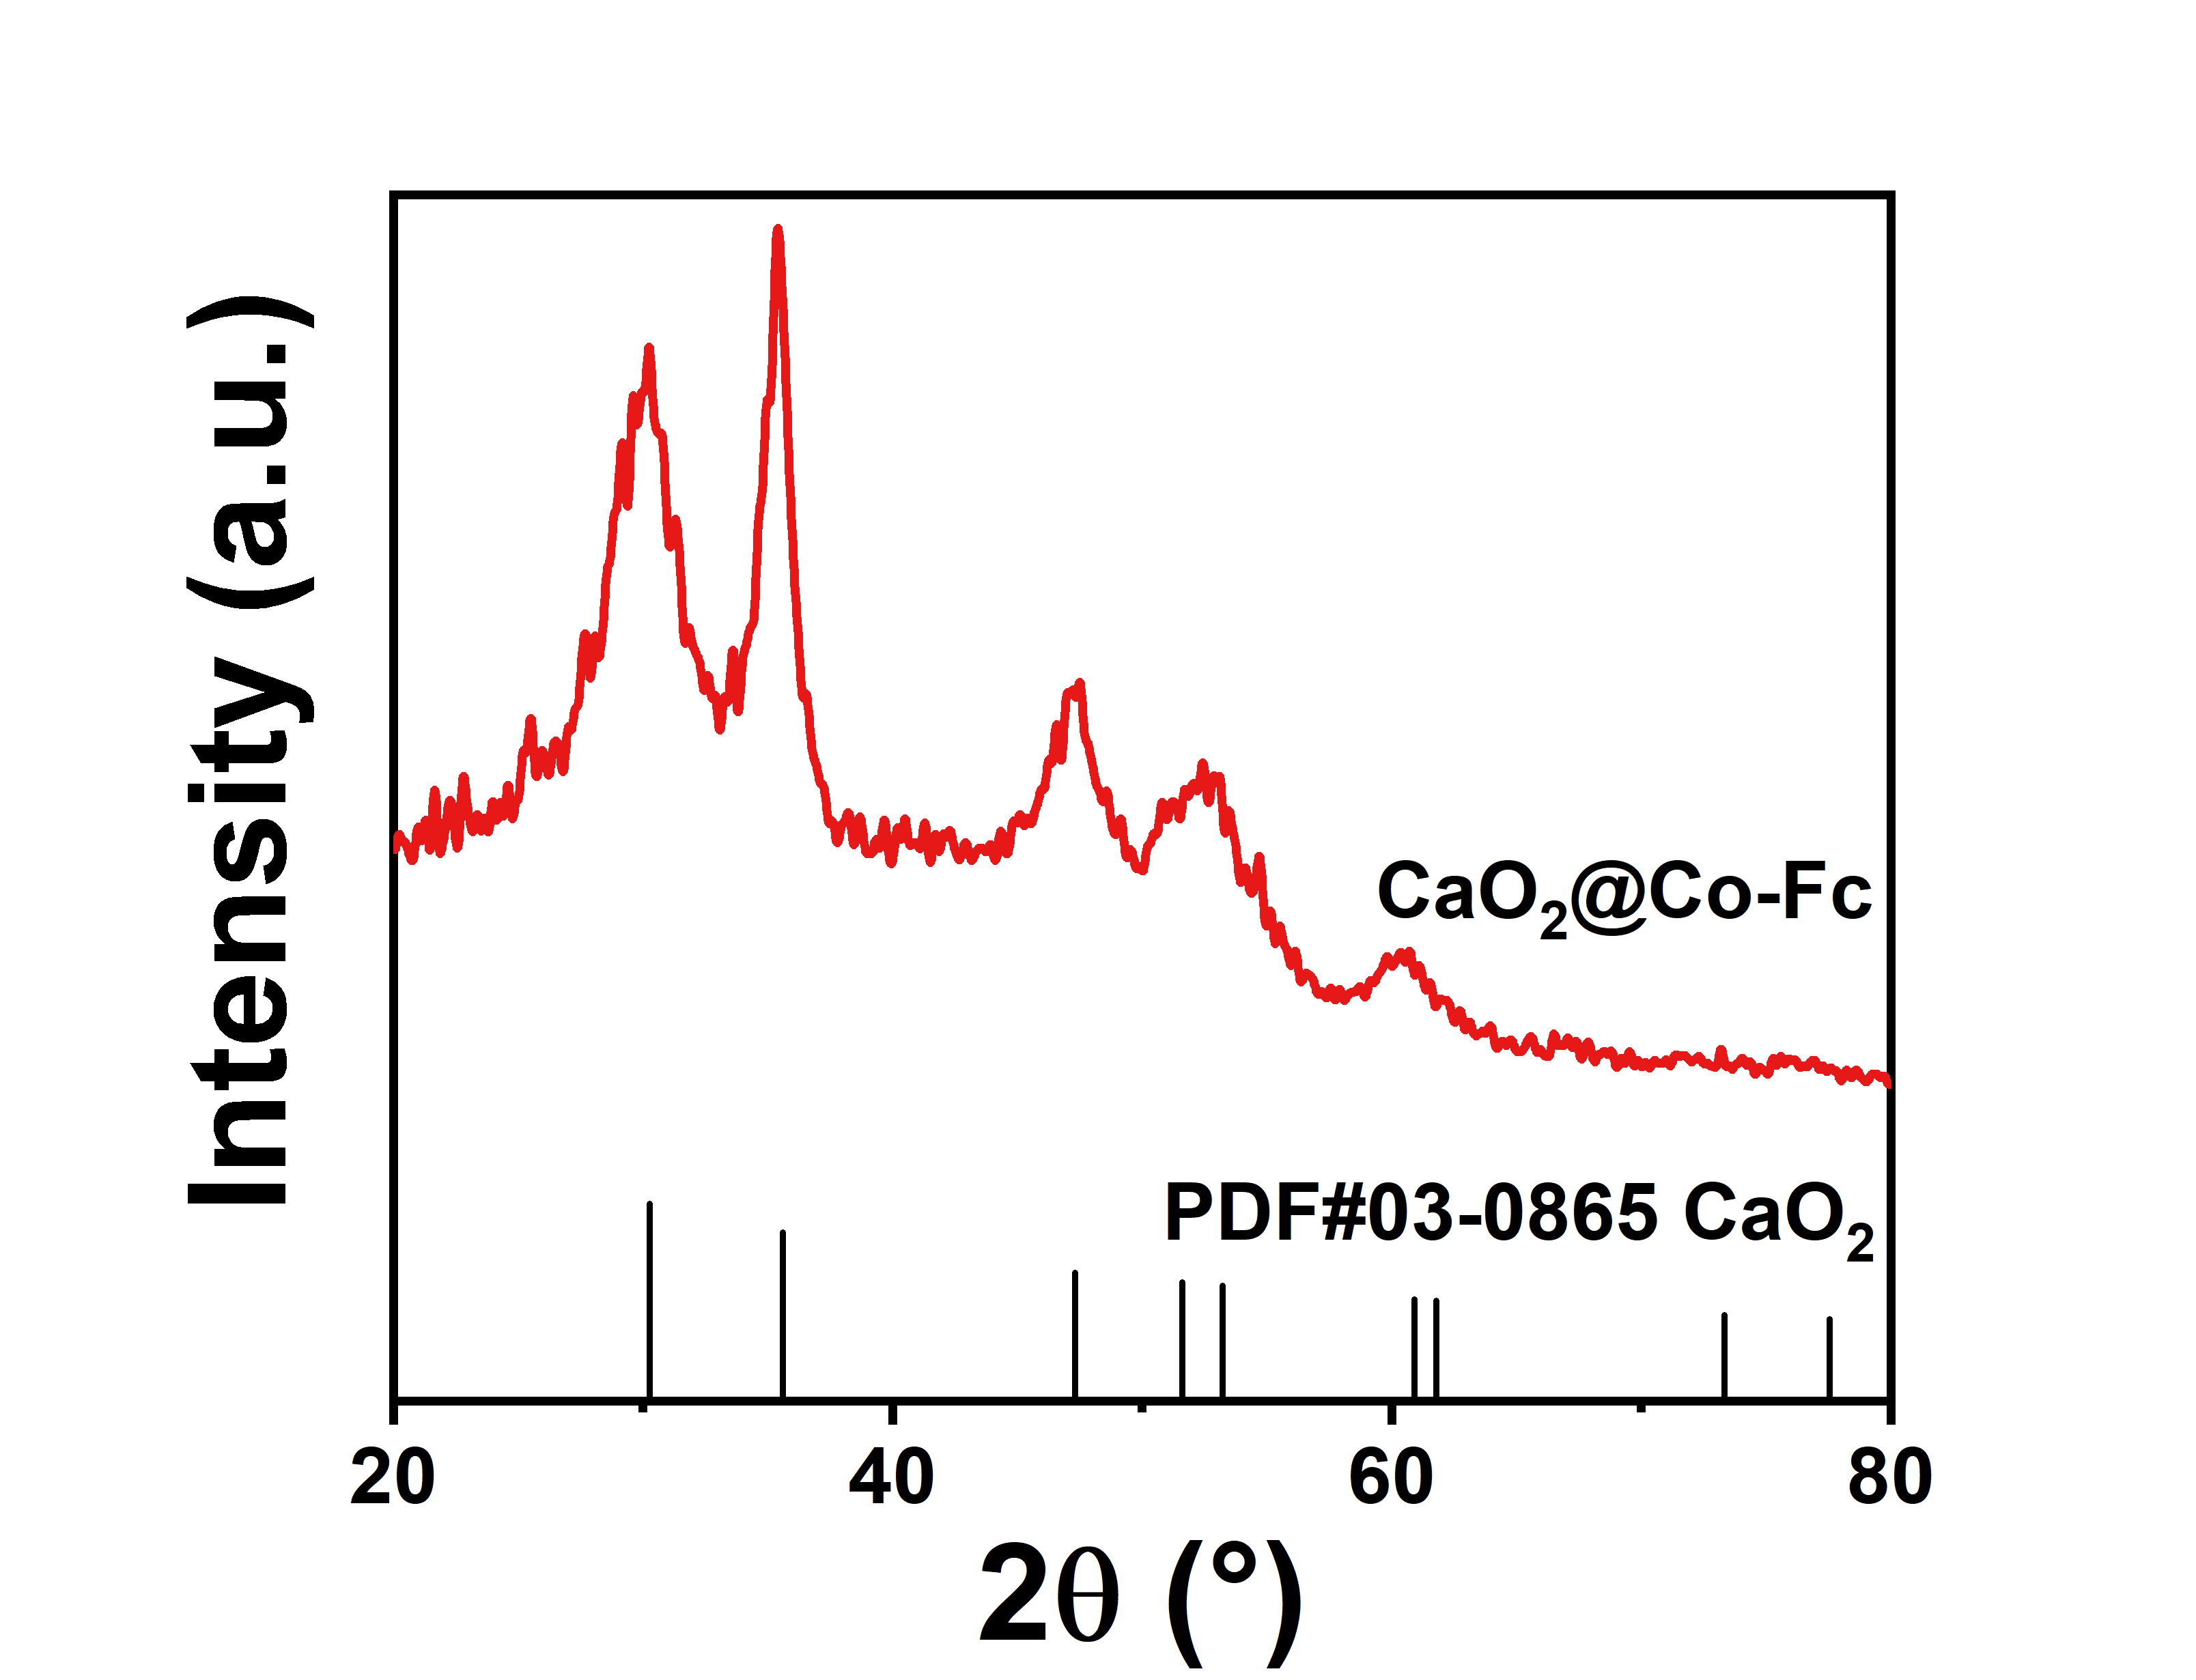


**Figure S5** XRD pattern of CaO2@Co-Fc.


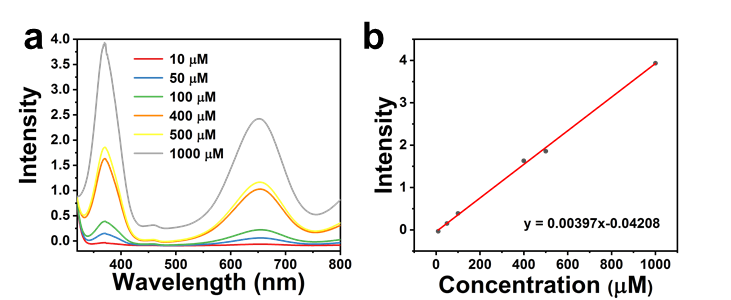


**Figure S6** Standard curves of H2O2 at the peak of 372 nm by TMB method: (a) UV-vis absorbance spectra and (b) plotting curve of TMB solution with the addition of different concentrations of H2O2.


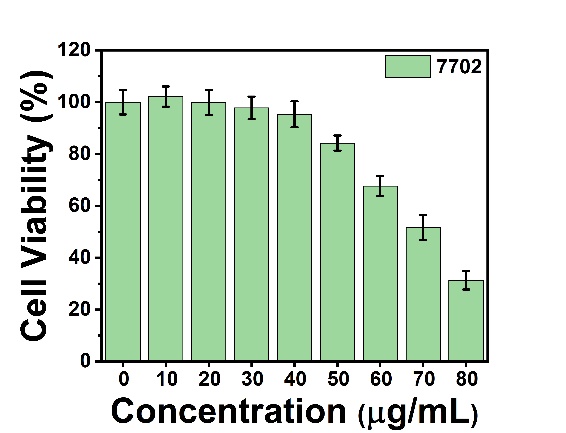


**Figure S7** The viability of 7702 cells cultured with CaO2 with varied concentrations.


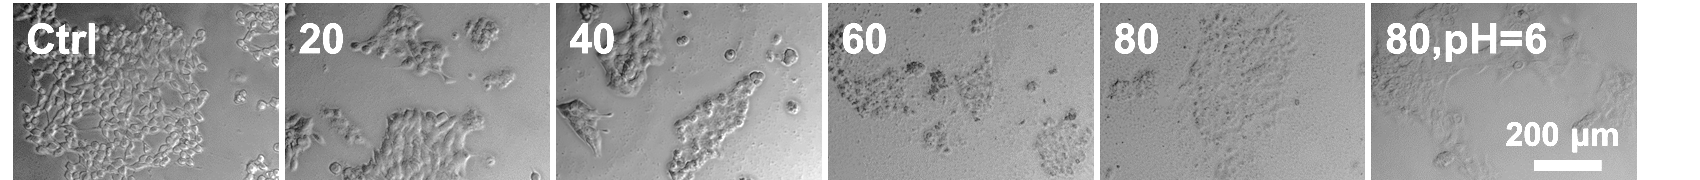


**Figure S8** Bright field images of 4T1 cells incubated with different concentrations of CaO2@Co-Fc after calcein-AM and PI staining for live & dead.


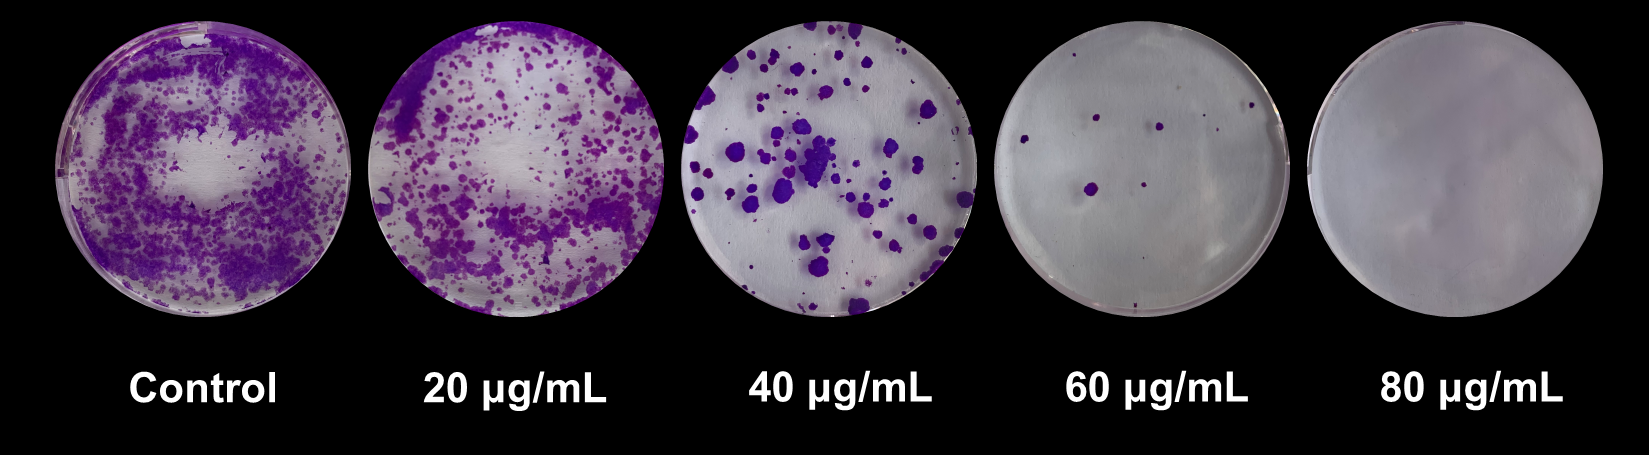


**Figure S9** Colony formation of 4T1 cells incubated with different concentrations of CaO2@Co-Fc.


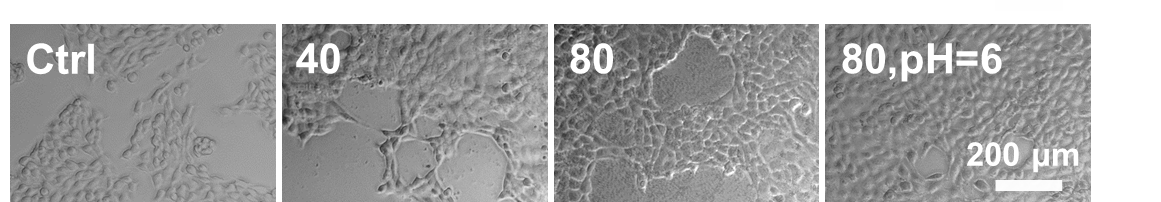


**Figure S10** Bright field images of 4T1 cells incubated with different treatments after DCFH-DA staining for intercellular ROS.


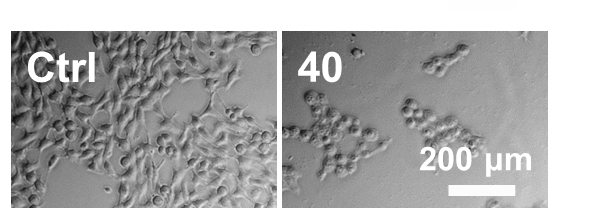


**Figure S11** Bright field images of 4T1 cells incubated with or without CaO2@Co-Fc after Fluo-4 AM staining for intercellular Ca2+ accumulation.
